# Supplementary material
Source: publisher figshare collection journal article supplement (https://plos.figshare.com/articles/dataset/_/6464279)
Supplement: Supplementary file [file 1]

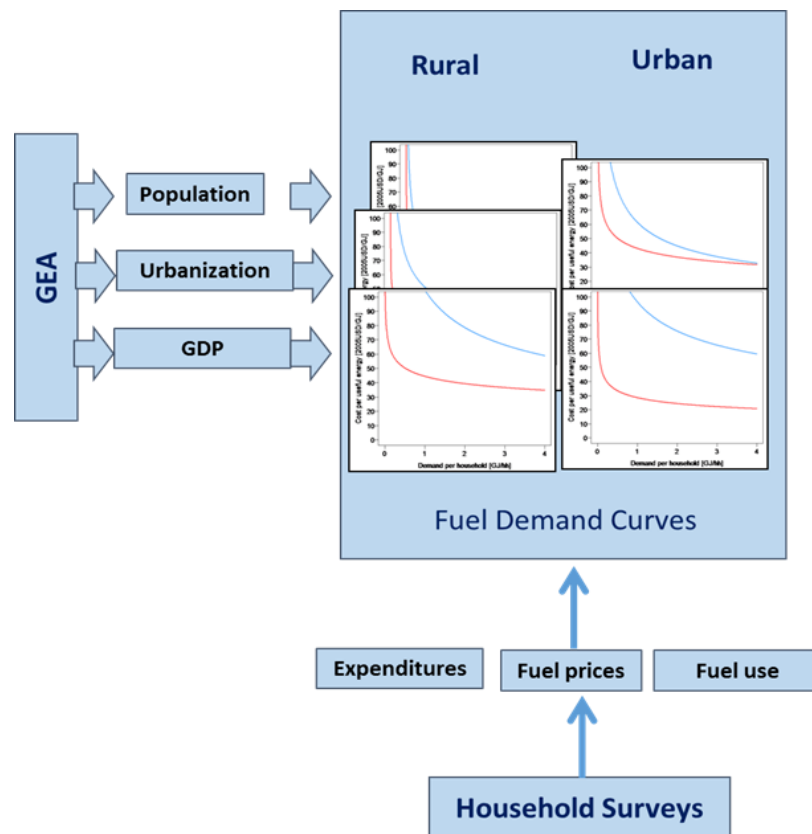

Fig S1: Schematic overview of model and data sources (Note: A public version of the model is available at <http://data.ene.iiasa.ac.at/MESSAGE-Access/>).
