# Supplementary material
Source: publisher figshare collection journal article supplement (https://plos.figshare.com/articles/dataset/_/6464279)
Supplement: Supplementary file [file 1]

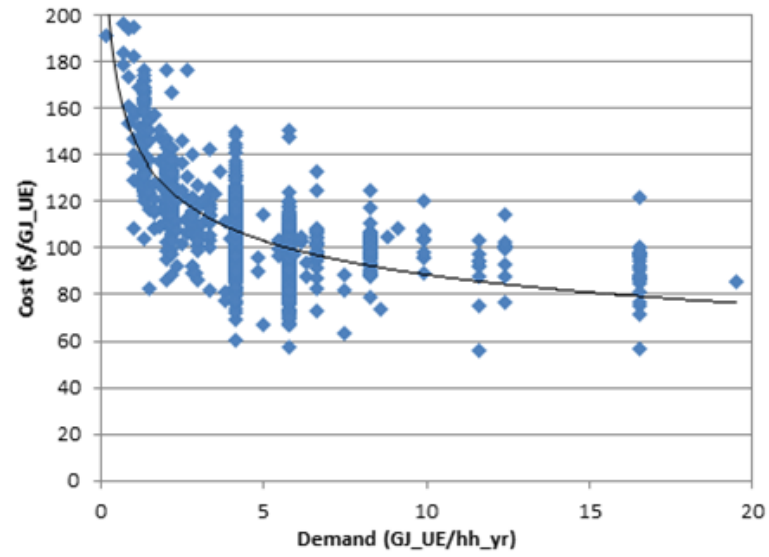

*Fig S2: Example demand curve for LPG in Guatemala for the U2 expenditure group*
